# 1   **Effects of a demand optimization intervention on** 2   **laboratory test utilization in primary care**

3

4   **Magda Bucholc<sup>1\*</sup>, Maurice O’Kane<sup>2</sup>, Brendan O’Hare<sup>3</sup>, Ciaran Mullan<sup>3</sup>, Paul**  
5   **Cavanagh<sup>3</sup>, Siobhan Ashe<sup>2</sup>**

6

7   <sup>1</sup> Intelligent Systems Research Centre, University of Ulster, Magee Campus,  
8   Londonderry BT48 7JL, Northern Ireland, UK

9   <sup>2</sup> Altnagelvin Area Hospital, Western Health and Social Care Trust, Glenshane Road,  
10   Londonderry BT47 6SB, Northern Ireland, UK

11   <sup>3</sup> Western Local Commissioning Group, Gransha Park House, Clooney Road,  
12   Londonderry BT47 6FN, Northern Ireland, UK

13

14   \*Corresponding author

15   Email: [m.bucholc@ulster.ac.uk](mailto:m.bucholc@ulster.ac.uk) (MB)

# 16    **Abstract**

17    There is evidence of increasing use of laboratory tests with substantial variation  
18    between clinical teams which is difficult to justify on clinical grounds. The aim of this  
19    project was to assess the effect of a demand optimisation intervention project on  
20    laboratory test requesting by general practitioners (GPs) in an area of Northern Ireland  
21    supported by the Clinical Chemistry Laboratory service of Western Health and Social  
22    Care Trust (WHSCT). The intervention package was developed in conjunction with the  
23    Western Local Commissioning Group and consisted of educational initiatives, feedback  
24    to 55 individual practices on test request rates with ranking relative to other practices,  
25    and a small financial incentive for practices to reflect on their test requesting activity.  
26    Overall test utilization rates of profile tests, HbA<sub>1c</sub>, and PSA one year before, during,  
27    and one year after the intervention were measured using laboratory databases of the  
28    Altnagelvin Area Hospital, Tyrone County Hospital, and the Erne (South West Acute  
29    Hospital). The intervention was associated with mixed effects. First, we observed a  
30    reduction of 5.1% in the median profile test request rates and a decrease in their  
31    between practice variability. The overall downward trend in variability of profile test  
32    request rates was found statistically significant ( $p = 0.03$ ). Second, we found a  
33    significant increase in both the volume ( $p < 0.0001$ ) and between practice variability ( $p$   
34    = 0.0001) of HbA<sub>1c</sub> requests per patient with diabetes. The increase in HbA<sub>1c</sub> requests  
35    may reflect a more appropriate rate of diabetes monitoring and also the adoption of  
36    HbA<sub>1c</sub> as a diagnostic test. Yet, the subsequent 600% increase in between practice  
37    variability of HbA<sub>1c</sub> ordering rates may imply an inconsistent implementation of  
38    recommended guidelines by GPs. Finally, there was a 29.3% increase in the median  
39    and 35% increase in between practice variability of request rates for PSA, the reasons  
40    for which are unclear.

## 41     **Introduction**

42     Laboratory testing is an integral part of the clinical decision making process for the  
 43     disease diagnostics, management, and prognosis [1]. This includes early disease  
 44     detection, disease surveillance, identification of patients at risk for a disease as well as  
 45     selection and evaluation of a patient's treatment based on the results of a lab test [2].  
 46     In recent years, the growing use of laboratory tests and in particular, the substantial  
 47     variation in test ordering rates between clinical teams have become a major concern  
 48     given rising health care costs [3-4]. The reasons for the increase in the total number of  
 49     order tests as well as the substantial variation in test ordering between GP practices  
 50     are still imperfectly understood; however, possible explanations include a lack of  
 51     knowledge about the appropriate use of individual tests, the use of different clinical  
 52     guidelines and protocols across GP practices, increased fear of errors and  
 53     malpractice liability claims as well as professional and practice-related factors, such as  
 54     GP's age, GP practice size or type [5-8].

55     While it is difficult to specify for most laboratory tests what an 'appropriate' test request  
 56     rate might be for a given patient population, it is probable that between-practice  
 57     variability in test ordering rates is to some extent reflected in inappropriate laboratory  
 58     utilization through over-requesting (unnecessary repeat requesting of tests), under-  
 59     requesting (a failure to prescribe clinically indicated testing), and incorrect requesting  
 60     (selection of an incorrect laboratory test) [9-12]. Several studies showed that around  
 61     25-40% of test requests may be unnecessary [13-15], and do not contribute to patient  
 62     management. While overutilization of laboratory tests drives costs up across the health  
 63     care system, their under- or incorrect ordering can have serious consequences for the  
 64     individual patient through failure to diagnose or manage disease optimally [16].

65 Many attempts have been made to change test ordering performance. A number of  
66 studies reported on various clinical interventions designed to improve laboratory  
67 utilization and manage demand for laboratory services, with success depending on the  
68 medical context, local factors and clinical team engagement [17]. The efforts to  
69 improve the appropriateness of laboratory testing behaviour included educational  
70 initiatives on the role, limitations, and appropriate retest intervals of individual  
71 laboratory tests [18], feedback-based interventions on test usage [19-22], a redesign of  
72 laboratory tests request forms [23], and implementation of locally agreed clinical  
73 guidelines and electronic medical record prompts for laboratory test orders [24,25]. A  
74 number of studies showed that most of successful strategies for optimizing laboratory  
75 demand consisted of a combination of interventions [26,27].

76 In this study, we examined whether the volume and variability in laboratory test  
77 requests by GPs was reduced by a multifaceted laboratory demand optimisation  
78 intervention undertaken as a quality improvement initiative conducted in a primary care  
79 setting. In addition, we compared the effects of the intervention on the laboratory test  
80 ordering behaviour in GP practices located in rural and urban areas.

## 81 **Materials and Methods**

### 82 **Study setting**

83 The demand optimization intervention was undertaken in 55 separate primary care  
84 medical practices within the catchment area of the Northern Ireland (NI) Western  
85 Health and Social Care Trust (WHSCT) covering NI local council areas of  
86 Londonderry, Limavady, Strabane, Omagh, and Fermanagh. At the commencement of  
87 the project, the individual primary care medical practices were composed of between  
88 one and eight (mean 3.1) general medical practitioners; eight of the 55 practices  
89 comprised a single general medical practitioner. The WHSCT provides laboratory

90 services to these practices with networked laboratories in each of the three large urban  
91 centres of Londonderry, Omagh, and Enniskillen. The primary care practices were  
92 further situated in either rural or urban areas using data from the Census Office of the  
93 Northern Ireland Statistics and Research Agency [24]. Since the NI settlement  
94 classification does not give continuous spans of particular area types, a practice was  
95 designated as urban if its postal address was situated in a settlement of more than  
96 10,000 residents following the urban-rural classification thresholds used by the  
97 Department for Environment, Food and Rural Affairs (DEFRA) and the Department for  
98 Communities and Local Government (DCLG) [28]. Under this definition, 31 practices  
99 were designated as urban and 24 as rural.

## 100 **Data collection**

101 To investigate effectiveness of the demand optimization intervention, we studied data  
102 on laboratory test requests from individual primary medical practices in WHSCT over  
103 five consecutive 12 month periods (1 April to 31 March) from 2011-12 (the pre-  
104 intervention or 'baseline' period), through 2012-2015 (the intervention period), to 2015-  
105 16 (the post-intervention period). Test request data were extracted from the laboratory  
106 databases of the Altnagelvin Area Hospital (Londonderry), Tyrone County Hospital  
107 (Omagh), and the Erne Hospital (subsequently the South West Acute Hospital)  
108 (Enniskillen).

109 The following test groups were studied: 1) profile tests including electrolyte profile, lipid  
110 profile, thyroid profile (FT4 and TSH), liver profile, and immunoglobulin profile; 2)  
111 glycosylated haemoglobin (HbA<sub>1c</sub>), and 3) prostate-specific antigen (PSA). The number  
112 of profile tests (electrolyte profile, lipid profile, thyroid profile, liver profile,  
113 immunoglobulin profile) requested in each practice was standardised against the  
114 number of registered patients in the practice and expressed as requests per 1000

115 patients. HbA<sub>1c</sub> was standardised against the number of patients with diabetes per  
116 practice while PSA was standardised against the number of male patients per practice.

117 Information on individual primary care practices regarding registered patient numbers,  
118 the number of male patients, and patients with diabetes was obtained from the  
119 Western Health and Social Services Board Integrated Care Partnership system. The  
120 patient population served by the 55 practices over the 5-year study period was 316 382  
121 (2011-12), 316 688 (2012-13), 318 057 (2013-14), 319 383 (2014-2015), and 326 429  
122 (2015-2016). The total number of male patients registered in all studied GP practices  
123 was 160 046 (2011-12), 152 265 (2012-13), 161 003 (2013-14), 161 824 (2014-2015)  
124 and 165 532 (2015-2016) while the number of patients with diabetes was 12 372  
125 (2011-12), 12 871 (2012-13), 13 130 (2013-14), 13 481 (2014-2015) and 14 241  
126 (2015-2016).

127 Throughout the study period, laboratory tests from primary care were ordered using a  
128 paper laboratory request form. All of the tests considered here (with the exception of  
129 immunoglobulin profiles) were listed on the request form and were requested by ticking  
130 a box on the test request form adjacent to the test name; an immunoglobulin profile  
131 was ordered by free text entry on the request form.

## 132 **Intervention design**

133 The active intervention was designed to support optimal use of laboratory testing  
134 through a quality improvement initiative and took place over the three year period from  
135 Apr 2012 to Mar 2015. The intervention package was developed in conjunction with the  
136 Western Local Commissioning Group (responsible for commissioning and managing  
137 primary care services and consisted of senior primary care doctors). The intervention  
138 included several discrete elements. Firstly, awareness of the intervention was  
139 promoted through educational sessions on the benefits to patients and clinical teams of

140 the optimal use of laboratory tests. Secondly, educational material was developed in  
 141 conjunction with primary care clinicians and covered the major clinical indications for a  
 142 range of most commonly requested tests (i.e. profile tests, HbA1c and PSA)  
 143 summarised on a single A4 size page. This material together with a document outlining  
 144 suggested minimum retesting intervals, prepared for the Clinical Practice Group of the  
 145 Association for Clinical Biochemistry and Laboratory Medicine and supported by the  
 146 Royal College of Pathologists, were circulated electronically to all GPs. This  
 147 information was supplemented by face-to-face educational sessions with primary care  
 148 teams and presentation of data showing the local variability on test requesting rates.  
 149 Thirdly, all primary care teams were asked to engage in the process of reviewing test  
 150 requesting procedures within their practice (i.e. what staff are allowed to request tests  
 151 and what is the process for test requesting), and to reflect on the information provided  
 152 on their practice test requesting rates and ranking in comparison to other practices.  
 153 Finally, GPs were further asked to reflect on the appropriateness of their test  
 154 requesting volume taking into account the educational package, minimum retest  
 155 intervals and other relevant guidelines.

156 The Western Local Commissioning Group (WLCG) also made available funding to  
 157 incentivise participation in the laboratory demand management initiative. All  
 158 participating primary care practices received a payment of £0.30 per patient registered  
 159 on their practice list to engage in the process of reviewing and reflecting on test  
 160 requesting activity. Prior to the intervention each practice received information on its  
 161 standardised test request rates over the baseline year and its ranking in relation to  
 162 standardised test request rates of all other practices served by the laboratory.

## 163 **Statistical analysis**

164 All statistical analyses were performed using R statistical software, version 3.3.3.  
165 Changes in the number of standardised test requests and between-practice variability  
166 in standardised test request rates for profile tests, HbA<sub>1c</sub> and PSA were compared to  
167 the pre-intervention ('baseline') period (April 2011 – March 2012).

168 Between-practice variability in ordering of laboratory tests was assessed by calculating  
169 the variance ( $\sigma^2$ ). Due to non-normality of the distribution of the standardised number  
170 of laboratory test requests caused by the presence of 'practice outliers' (i.e. practices  
171 with test request rates statistically different from the ordering rates in the other  
172 practices), the differences in variances calculated for pre- and post-intervention periods  
173 were tested using the Fligner-Killeen (FK) test [29]. The Fligner-Killeen method  
174 provides a robust measure, not sensitive to violations of normality, for assessing the  
175 homogeneity of variances by ranking the absolute values of differences for each  
176 observation from corresponding sample medians [29]. Note that the normality of  
177 laboratory test data was tested with the Shapiro-Wilk test [30]. The non-parametric  
178 Mann-Whitney-Wilcoxon (MWW) test was used to compare distributions of test request  
179 rates from pre- and post-intervention period [31]. In addition, we examined trends in  
180 variability of laboratory test ordering using the Mann-Kendall (MK) test [32]. The  
181 Mann-Kendall technique is a nonparametric form of monotonic trend regression  
182 analysis and hence suitable for not normally distributed data [32]. In all analysis, a  $p <$   
183 0.05 was considered significant.

## 184 **Governance considerations**

185 This project was undertaken as a quality improvement initiative to promote optimal use  
186 of laboratory services. As it was quality improvement initiative rather than a research  
187 project, research ethics approval was not considered necessary. WHSCT is the keeper



188 of the laboratory information system data, and all information used within the study was  
189 anonymised and not traceable to an individual patient or general practitioner.

190

191

## 192 **Results**

193 We evaluated the effectiveness of the demand management intervention on the  
194 changes in the number and variability in laboratory test request rates for profile tests,  
195 HbA<sub>1c</sub> and PSA by comparing the between-practice differences in test utilization  
196 between the pre-intervention (Apr 2011 – Mar 2012) and post-intervention periods (Apr  
197 2015 – Mar 2016) (Fig 1). We found considerable differences across practices and  
198 time in test requesting activity.

199 **Fig 1.** The standardized number of test requests for A) profile test, B) HbA<sub>1c</sub>, and C)  
200 PSA in pre- (red) and post- (blue) intervention period for 55 investigated general  
201 practices.

## 202 **Temporal changes in the standardized number of request rates**

203 The median standardized number of profile test requests for all practices fell from 1519  
204 per 1000 patients pre-intervention to 1441 per 1000 patients one year post intervention  
205 (a reduction of 5.1%) (Table 1); however this change was found statistically  
206 insignificant (MWW  $p = 0.3$ ) (Table 2). For HbA<sub>1c</sub>, there was a significant increase in  
207 the median number of request rates from 1.8 requests per patient with diabetes pre-  
208 intervention to 2.8 post-intervention (MWW  $p < 0.0001$ ). The median PSA requests per  
209 1000 male patients increased by 29.3% from 53.2 to 68.9 following the intervention  
210 (MWW  $p = 0.048$ ) (Table 1 and 2).

211

**Table 1.** Standardised test request rates for profile tests, HbA<sub>1c</sub>, and PSA over five consecutive 12 month periods (1 April to 31 March) from 2011-12 (the pre-intervention or 'baseline' period), through 2012-2015 (the intervention period), to 2015-16 (the post-intervention period).

|                                                         | Pre-intervention  |                    | Intervention      |                   | Post-intervention |
|---------------------------------------------------------|-------------------|--------------------|-------------------|-------------------|-------------------|
|                                                         | Apr 2011-Mar 2012 | Apr 2012-Mar 2013  | Apr 2013-Mar 2014 | Apr 2014-Mar 2015 | Apr 2015-Mar 2016 |
| <b>Profile tests</b>                                    |                   |                    |                   |                   |                   |
| Median, (25 <sup>th</sup> -75 <sup>th</sup> percentile) | 1519, (1230,1765) | 1494, (1280-1762)  | 1422, (1247-1658) | 1418, (1277-1606) | 1441, (1244-1644) |
| Mean, (95%CI)                                           | 1554, (1427,1681) | 1556, (1429,1682)  | 1499, (1380,1619) | 1485, (1367,1603) | 1498, (1387,1609) |
| (Range)                                                 | (798-3919)        | (809-4043)         | (879-3918)        | (868-3840)        | (942-3530)        |
| Variance                                                | 220152            | 219471             | 195874            | 190917            | 168873            |
| <b>HbA<sub>1c</sub></b>                                 |                   |                    |                   |                   |                   |
| Median, (25 <sup>th</sup> -75 <sup>th</sup> percentile) | 1.8, (1.6-2.0)    | 2.0, (1.7-2.3)     | 2.1, (1.8-2.8)    | 2.3, (2.0-2.9)    | 2.8, (2.4-3.5)    |
| Mean, (95%CI)                                           | 1.9, (1.7,2.0)    | 2.0, (1.9,2.2)     | 2.3, (2.1,2.5)    | 2.6, (2.4,2.9)    | 3.0, (2.7 3.3)    |
| (Range)                                                 | (1.1-3.1)         | (1.1-3.4)          | (1.3-4.6)         | (1.5-6.0)         | (1.7-8.1)         |
| Variance                                                | 0.2               | 0.3                | 0.6               | 0.8               | 1.2               |
| <b>PSA</b>                                              |                   |                    |                   |                   |                   |
| Median, (25 <sup>th</sup> -75 <sup>th</sup> percentile) | 53.2, (40.4-84.1) | 59.2, (42.8-101.2) | 59.5, (48.8-89.6) | 63.9, (47.9-83.1) | 68.9, (51.8-90.0) |
| Mean, (95%CI)                                           | 69.4, (56.7,82.0) | 79.2, (62.3,96.0)  | 79.6, (60.2,99.0) | 74.8, (62.1,87.4) | 82.9, (68.2,97.6) |
| (Range)                                                 | (19.6-279.3)      | (19.9-396.1)       | (23.1-527.6)      | (17.1-274.0)      | (26.4-296.9)      |
| Variance                                                | 2193              | 3896               | 5154              | 2193              | 2961              |

## Temporal changes in variability of laboratory test ordering

To assess the direction and magnitude of changes in variability of ordering behaviour associated with the intervention, we calculated the variance of test request rates in the post-intervention period and compared it to the pre-intervention data. We also

221 examined the trend in variance across five consecutive time periods, from Apr 2011 –  
 222 Mar 2012 to Apr 2015 – Mar 2016 (Table 1). The variance for profile test requests fell  
 223 from  $\sigma^2 = 220152$  pre-intervention to  $\sigma^2 = 168873$  one year post intervention (a  
 224 reduction of 23.3%). Despite the fact that this change in variance was found not  
 225 statistically significant (FK test  $p = 0.2$ ), the Mann–Kendall test indicated the monotonic  
 226 statistically significant downward trend in variability of profile test request rates ( $p =$   
 227  $0.03$ ) (Table 2). Variance of HbA<sub>1c</sub> request rates increased from  $\sigma^2 = 0.2$  to  $\sigma^2 = 1.2$  (an  
 228 increase of 600%, FK  $p = 0.0001$ ). In addition, we observed a statistically significant  
 229 upward trend in variance of HbA<sub>1c</sub> over the study period (MK  $p = 0.03$ ). The between  
 230 practice variability in the standardized number of PSA requests increased by 35%;  
 231 however, the reported change was not significant at 95% confidence level (FK  $p = 0.9$ )  
 232 (Table 1 and 2).

### 233 **Differences in laboratory test requesting between rural and urban** 234 **practices**

235 Rural practices had a significantly higher median number of profile request rates than  
 236 urban practices at all time points: baseline, during the intervention and at one year post  
 237 intervention (Table 3). However, a significant reduction in the median profile test  
 238 request rates was exclusively observed in rural practices where requests fell by  
 239 approximately 11.9% (MWW  $p = 0.04$ ) as compared to no significant change in  
 240 ordering behaviour in urban practices (MWW  $p = 0.9$ ) (Table 2). The median PSA  
 241 request rates per 1000 male patients increased from 70.4 pre-intervention to 78.2 post-  
 242 intervention in rural practices (MWW  $p = 0.2$ ) and from 49.2 pre-intervention to 59.4  
 243 post-intervention (MWW  $p = 0.1$ ) in urban practices respectively. Given HbA<sub>1c</sub>, we  
 244 reported a significant increase in the median test requests per patient with diabetes  
 245 both in rural and urban GP practices; in both cases MWW  $p < 0.0001$ . It is worth noting  
 246 that the median of HbA<sub>1c</sub> request rates was substantially lower than their mean over the

whole period of investigation suggesting the presence of practices with 'outlier' high request rates.

**Table 2.** Differences in profile test, HbA<sub>1c</sub>, and PSA ordering activity between the pre- (Apr 2011 - Mar 2012) and post-intervention (Apr 2015 - Mar 2016) period. Mann-Whitney-Wilcoxon (MWW) test *p*-value assesses differences between pre- and post-intervention distributions of test request rates. Fligner-Killeen (FK) test *p*-value refers to the significance level of differences in variances. Mann-Kendall (MK) test *p*-value assesses trends in variability of laboratory test ordering. MWW and FK *p*-values < 0.05 indicate significant differences in distribution and variance of test request rates (\*). The direction of change in variability of test request rates is indicated by arrows: ↑ for increase and ↓ for decrease. MK *p*-value < 0.05 implies a monotonic (downward or upward) trend in data (\*). MK *S*-value refers to the direction of the trend i.e. a negative *S*-value corresponds to the downward trend while a positive *S*-value indicates an upward trend.

|                            | Profile tests | HbA <sub>1c</sub> | PSA    |
|----------------------------|---------------|-------------------|--------|
| <u>All</u>                 |               |                   |        |
| Fligner-Killeen test       |               |                   |        |
| <i>p</i> -value            | 0.2 ↓         | 0.0001* ↑         | 0.9 ↑  |
| Mann-Whitney-Wilcoxon test |               |                   |        |
| <i>p</i> -value            | 0.3           | < 0.0001*         | 0.048* |
| Mann-Kendall test          |               |                   |        |
| <i>p</i> -value            | 0.03*         | 0.03*             | 1      |
| <i>S</i> -value            | -10           | 10                | 0      |
| <u>Urban</u>               |               |                   |        |
| Fligner-Killeen test       |               |                   |        |
| <i>p</i> -value            | 0.6 ↓         | 0.02* ↑           | 0.9 ↓  |
| Mann-Whitney-Wilcoxon test |               |                   |        |
| <i>p</i> -value            | 0.9           | < 0.0001*         | 0.1    |
| Mann-Kendall test          |               |                   |        |
| <i>p</i> -value            | 0.2           | 0.2               | 0.5    |
| <i>S</i> -value            | -6            | 6                 | -4     |
| <u>Rural</u>               |               |                   |        |
| Fligner-Killeen test       |               |                   |        |
| <i>p</i> -value            | 0.3 ↓         | 0.008* ↑          | 0.6 ↑  |

|                            |      |           |     |
|----------------------------|------|-----------|-----|
| Mann-Whitney-Wilcoxon test |      |           |     |
| <i>p</i> -value            | 0.04 | < 0.0001* | 0.2 |
| Mann-Kendall test          |      |           |     |
| <i>p</i> -value            | 0.5  | 0.03      | 0.8 |
| S-value                    | -4   | 10        | 2   |

261 Rural practices had generally higher variance in request rates for profile tests, HbA<sub>1c</sub>,  
262 and PSA than urban practices at all time points (Table 2). We did not observe a  
263 significant change in variance of profile tests between pre- and post-intervention  
264 periods, either in rural (FK  $p = 0.3$ ) or urban (FK  $p = 0.6$ ) practices; however in both  
265 cases we reported a downward trend in variance (a  $\sigma^2$  reduction of 20.7% and 9.2%  
266 respectively). In contrast, a statistically significant change in variance was reported for  
267 HbA<sub>1c</sub> both in rural (FK  $p = 0.008$ ) and urban (FK  $p = 0.02$ ) areas. Despite the 42.9%  
268 increase in variance for PSA request rates in rural practices and simultaneous 10.2%  
269 decrease in the standardized PSA test requests in urban practices, none of these  
270 changes were found statistically significant (Table 2).

271 **Table 3.** A standardised number of profile test, HbA<sub>1c</sub>, and PSA request rates for rural  
272 and urban GP practices over five consecutive 12 month periods (1 April to 31 March)  
273 from 2011-12 (the pre-intervention or 'baseline' period), through 2012-2015 (the  
274 intervention period), to 2015-16 (the post-intervention period).

|                                                               | Pre-intervention      |                       | Intervention          |                       | Post-intervention     |
|---------------------------------------------------------------|-----------------------|-----------------------|-----------------------|-----------------------|-----------------------|
|                                                               | Apr 2011-<br>Mar 2012 | Apr 2012-<br>Mar 2013 | Apr 2013-<br>Mar 2014 | Apr 2014-<br>Mar 2015 | Apr 2015-<br>Mar 2016 |
| <b>Profile tests</b>                                          |                       |                       |                       |                       |                       |
| <u>Rural</u>                                                  |                       |                       |                       |                       |                       |
| Median,<br>(25 <sup>th</sup> -75 <sup>th</sup><br>percentile) | 1706,<br>(1461-1902)  | 1637,<br>(1480-1853)  | 1489,<br>(1350-1730)  | 1579,<br>(1325-1646)  | 1503,<br>(1373-1657)  |
| Mean,<br>(95%CI)                                              | 1720,<br>(1486,1953)  | 1726,<br>(1493,1960)  | 1604,<br>(1370,1837)  | 1581,<br>(1350,1813)  | 1566,<br>(1359,1774)  |
| (Range)                                                       | (998-3919)            | (1112-4043)           | (1139-3918)           | (868-3840)            | (1073-3530)           |
| Variance                                                      | 317033                | 314628                | 318440                | 312665                | 251371                |
| <u>Urban</u>                                                  |                       |                       |                       |                       |                       |

|                                                               |                       |                        |                        |                       |                        |
|---------------------------------------------------------------|-----------------------|------------------------|------------------------|-----------------------|------------------------|
| Median,<br>(25 <sup>th</sup> -75 <sup>th</sup><br>percentile) | 1369,<br>(1168-1642)  | 1424,<br>(1212-1644)   | 1327,<br>(1215-1596)   | 1361,<br>(1211-1530)  | 1380,<br>(1211-1619)   |
| Mean,<br>(95%CI)                                              | 1426,<br>(1297,1555)  | 1424,<br>(1297,1551)   | 1418,<br>(1301,1536)   | 1410,<br>(1294,1527)  | 1444,<br>(1321,1567)   |
| (Range)                                                       | (798-2543)            | (809-2356)             | (879-2205)             | (893-2297)            | (942-2368)             |
| Variance                                                      | 123789                | 119431                 | 102533                 | 100589                | 112373                 |
| <b>HbA<sub>1c</sub></b>                                       |                       |                        |                        |                       |                        |
| <u>Rural</u>                                                  |                       |                        |                        |                       |                        |
| Median,<br>(25 <sup>th</sup> -75 <sup>th</sup><br>percentile) | 1.8,<br>(1.6-2.1)     | 2.1,<br>(1.7-2.3)      | 2.1,<br>(1.8-2.6)      | 2.3,<br>(1.9-2.9)     | 2.9,<br>(2.3-3.6)      |
| Mean,<br>(95%CI)                                              | 1.9,<br>(1.7,2.1)     | 2.1,<br>(1.6,2.3)      | 2.3,<br>(2.0,2.7)      | 2.8,<br>(2.3,3.3)     | 3.2,<br>(2.6,3.8)      |
| (Range)                                                       | (1.4-3.0)             | (1.3-3.1)              | (1.4-4.6)              | (1.6-6.0)             | (1.7-8.1)              |
| Variance                                                      | 0.2                   | 0.3                    | 0.7                    | 1.4                   | 2.2                    |
| <u>Urban</u>                                                  |                       |                        |                        |                       |                        |
| Median,<br>(25 <sup>th</sup> -75 <sup>th</sup><br>percentile) | 1.8,<br>(1.5-1.9)     | 1.9,<br>(1.7-2.3)      | 2.2,<br>(1.7-2.9)      | 2.4,<br>(2.0-2.8)     | 2.7,<br>(2.4-3.4)      |
| Mean,<br>(95%CI)                                              | 1.8,<br>(1.6,2.0)     | 2.0,<br>(1.8,2.2)      | 2.3,<br>(2.0,2.6)      | 2.5,<br>(2.2,2.7)     | 2.9,<br>(2.6,3.1)      |
| (Range)                                                       | (1.1-3.1)             | (1.1-3.4)              | (1.3-4.2)              | (1.5-3.9)             | (1.7-4.6)              |
| Variance                                                      | 0.2                   | 0.3                    | 0.6                    | 0.4                   | 0.5                    |
| <b>PSA</b>                                                    |                       |                        |                        |                       |                        |
| <u>Rural</u>                                                  |                       |                        |                        |                       |                        |
| Median,<br>(25 <sup>th</sup> -75 <sup>th</sup><br>percentile) | 70.4,<br>(49.8-115.0) | 70.8,<br>(43.5-124.8)  | 72.8,<br>(54.3-107.1)  | 74.6,<br>(55.8-102.8) | 78.2,<br>(65.2-105.7)  |
| Mean,<br>(95%CI)                                              | 87.4,<br>(62.9,112.0) | 101.9,<br>(67.5,136.3) | 103.1,<br>(60.7,145.4) | 93.4,<br>(68.2,118.7) | 106.8,<br>(77.4,136.2) |
| (Range)                                                       | (29.7-279.3)          | (35.5-396.1)           | (27.8-527.6)           | (38.5-274.0)          | (35.7-296.9)           |
| Variance                                                      | 3496.8                | 6880.5                 | 10485.7                | 3705.4                | 4997.0                 |
| <u>Urban</u>                                                  |                       |                        |                        |                       |                        |
| Median,<br>(25 <sup>th</sup> -75 <sup>th</sup><br>percentile) | 49.2,<br>(35.5-65.6)  | 50.1,<br>(39.7-69.0)   | 55.1,<br>(41.0-69.1)   | 55.4,<br>(44.3-70.2)  | 59.4,<br>(46.5-74.6)   |
| Mean,<br>(95%CI)                                              | 55.4,<br>(44.4,66.3)  | 61.6,<br>(48.9,74.2)   | 61.4,<br>(51.2,71.5)   | 60.3,<br>(50.6,70.0)  | 64.4,<br>(54.0,74.8)   |
| (Range)                                                       | (19.6-134.6)          | (19.9-170.9)           | (23.1-125.8)           | (17.1-129.8)          | (26.4-132.8)           |
| Variance                                                      | 891.0                 | 1191.4                 | 767.6                  | 703.8                 | 800.5                  |

## 275 Discussion

276 While it may be challenging to define an appropriate rate of requesting for most tests, it  
 277 is certainly difficult to justify very high levels of variability between clinical teams  
 278 providing care to broadly similar groups of patients within a single healthcare system.  
 279 This study found high levels of baseline variability between primary care practices in  
 280 the standardised number of profile tests, HbA<sub>1c</sub>, and PSA, with substantial differences  
 281 in variability in laboratory test utilization between rural and urban areas. There is little  
 282 reason to believe that there were significant differences in the characteristics of the  
 283 practice patient populations within each of rural and urban areas in terms of disease  
 284 prevalence or morbidity that might explain such high variability. For instance, O'Kane  
 285 et al. found no link between the number of HbA<sub>1c</sub> measurements performed per patient  
 286 with diabetes in practices in an area of N. Ireland and either the reported prevalence of  
 287 diabetes or Quality and Outcome Frameworks (QOF) scores defining the practice  
 288 performance in the management of diabetes.

289 This quality improvement intervention employed to optimise utilization of laboratory  
 290 tests in primary care was associated with mixed effects. Firstly, there was a reduction  
 291 of 5.1% in the median profile test requests per 1000 patients (as measured at one year  
 292 post intervention). This was accounted for entirely by a reduction in rural practices.  
 293 Secondly, we observed a 23.3% reduction in between practice variability in profile test  
 294 requesting and this was seen in both urban and rural practices (a decrease in variance  
 295 of 9.2% and 20.7% respectively). However, during and post-intervention, the  
 296 standardised profile test request rates and variability continued to be higher in rural  
 297 than urban practices. Although both the volume and variability in ordering rates for  
 298 profile tests were reduced, these changes were not statistically significant meaning that  
 299 the observed differences between the pre- and post-intervention period may have  
 300 resulted from fluctuation around the baseline or other as yet determined factors.

301 Despite non-significant differences in profile test utilization between the pre- and post-  
302 intervention period, the overall statistically significant downward trend in variability ( $p =$   
303 0.03) may indicate a further future decrease in ordering of profile tests.

304 Given HbA<sub>1c</sub>, we observed a significant increase in both the median number of test  
305 requests per patient with diabetes (an increase of 55.6%) as well as in between  
306 practice variability (600% increase in variance) between pre- and post-intervention  
307 period. Best practice guidelines suggest measuring HbA<sub>1c</sub> two to three times per year  
308 in patients with diabetes and this had been highlighted in the educational material that  
309 formed part of the intervention [33]. The increased testing rate may therefore reflect  
310 more appropriate monitoring of patients with diabetes. However, as it was not possible  
311 to distinguish HbA<sub>1c</sub> samples which had been requested for diabetes monitoring from  
312 those requested for the purposes of diabetes diagnosis, it is difficult to be certain. The  
313 use of HbA<sub>1c</sub> as a diagnostic test for diabetes mellitus had been introduced in 2012 i.e.  
314 during the baseline period and it is possible that the increase in requesting reflected its  
315 adoption as a diagnostic test rather than as a monitoring test. Yet, the subsequent  
316 increase in between practice variability of HbA<sub>1c</sub> ordering rates may imply that the  
317 recommended guidelines on the management of patients with diabetes were not  
318 implemented consistently across GP practices.

319 The increase in the median PSA request rates of 29.3% may be related to the 4.3%  
320 rise in the prostate cancer incidence rates in WHSCT over the study period. However,  
321 we cannot also exclude the opposite that the increased incidence of prostate cancer  
322 may be a consequence of the increased number of PSA requests. In addition, some of  
323 the increase in PSA requesting could be associated with more PSA tests being carried  
324 out on asymptomatic men, i.e. requests non-compliant with the intervention guidelines.  
325 The 35% increase in variability in PSA request rates across general practices between  
326 the pre- and post-intervention period could imply greater differential adherence to the



327 national guidelines (e.g. PSA testing not recommended for screening of asymptomatic  
328 men) or may have been related to the considerable rise in prostate cancer incidence  
329 rates in only some GP practices. However, no evidence data at the individual practice  
330 level was available to test such hypothesis.

331 Although numerous previous studies had documented high degrees of variability in test  
332 requesting between primary care teams [34-36], a unique feature of our study was that  
333 it assessed the effect of the intervention on the changes in both the volume and  
334 between practice variability in test requesting. The relatively poor effectiveness of  
335 educational and financial initiatives in diminishing very pronounced differences in test  
336 volumes among general practices observed in our study may suggest that the demand  
337 optimization intervention undertaken was ineffective. It is clear that the dissemination  
338 of clinical management guidelines on appropriate re-testing intervals as well as the  
339 benchmarking scheme allowing individual practices to compare their requesting  
340 numbers against other practices did not have the effect anticipated. Yet, finding the  
341 more suitable interventions may prove to be difficult in the absence of identified factors  
342 affecting the variability in test requesting.

343 A number of initiatives for optimizing demand of laboratory test ordering, aiming at both  
344 overutilization and underutilization of tests, have been conducted in primary care.  
345 However, the effectiveness of these strategies varied. Several studies reported on  
346 mixed effects of educational interventions on laboratory test utilization. Baker et al  
347 showed that failure of feedback and educational initiatives to influence the utilization of  
348 laboratory tests was associated with baseline performance i.e. how often and how  
349 these initiatives were implemented [37]. It is therefore possible that the frequency and  
350 form of feedback with guidelines chosen for our study design was not appropriate. In  
351 addition, the effect of the demand optimization intervention described here might have  
352 been modulated by characteristics of local practices and opinions of individual GPs

353 regarding the role of laboratory tests in patient management. For instance, the  
354 observed increase in variability of PSA and HbA<sub>1c</sub> request rates may indicate that  
355 recommended guidelines did not predispose GPs to change their perceptions on the  
356 value and role of these tests in patient assessment.

357 Since the demand optimization intervention showed little effect on laboratory test  
358 request rates (e.g. the decrease in variability was only reported for profile tests), other  
359 clinical initiatives for optimizing the overall demand and variability of test requests,  
360 such as modifications to laboratory requisition forms or introduction of guideline driven  
361 decision support systems, should be considered. Previous studies reported on the  
362 significant changes in laboratory test ordering behaviour after a redesign of laboratory  
363 requisition forms to include fewer test choices [38], and after imposing a clinician-  
364 oriented restriction policy on the laboratory test-ordering mechanism (i.e. physicians  
365 were required to provide a justification for every test request) [39].

366 Our study has several limitations worth noting. First, we measured the effect of the  
367 demand optimization intervention on changes to laboratory utilization. It is however  
368 possible that factors other than the intervention were responsible for utilization  
369 changes. Second, since the intervention consisted of several discrete elements  
370 (educational sessions, feedback, review of test requesting procedures, financial  
371 incentive), it is difficult to determine which element had the largest effect on test  
372 requesting rates. Third, we acknowledge that the post-intervention follow-up period  
373 might have been too short to determine whether the intervention was in fact ineffective.  
374 Finally, increased requesting of laboratory tests does not necessarily translate to  
375 decreased appropriateness of their utilization. For instance, the post-intervention  
376 increase in median request rates for PSA and HbA<sub>1c</sub> does not necessarily imply  
377 inappropriate testing if it allowed improved patient management. However, the  
378 increase in between-practice variability in request rates for those two tests may

379 suggest some degree of inappropriateness in use of laboratory services. Previous work  
 380 has suggested that large between-practice variability in test utilization is more likely  
 381 caused by differences in the clinical practice of general practitioners rather than the  
 382 demographic or socioeconomic characteristics of the practices [36].

383 Our study has identified considerable variability between general practices in  
 384 laboratory test request rates and has sought to explore the effect of a demand  
 385 optimisation intervention on the volume and variability of laboratory test ordering.  
 386 Future qualitative work could address uncertainty around the factors affecting the  
 387 variability of test requesting.

## 388 **Acknowledgments**

389 The authors would wish to thank the IHAC collaborative network, especially KongFatt  
390 Wong-Lin, Colm Hayden, Brendan Bunting and Le Roy Dowey, for helpful discussions;  
391 Graham Moore, Austin Tanney, and Paul Barber for computing and technical support;  
392 and Stephen Lusty and Peter Devine for administrative support.

## 393 **Contributorship**

394 MB performed the analysis and interpretation of the results, and wrote the manuscript.  
395 MJO edited the manuscript. MJO, BOH, CM and PC designed and carried out the  
396 demand management intervention. MJO wrote the manuscript. BOH, CM and PC  
397 edited the manuscript. SA monitored the data collection. All the authors have accepted  
398 responsibility for the entire content of this submitted manuscript and approved  
399 submission.

## 400 **Funding**

401 This work was supported by the European Union's INTERREG VA Programme,  
402 managed by the Special EU Programmes Body (SEUPB); and Invest NI through  
403 Northern Ireland Science Park (Catalyst Inc) under the Northern Ireland International  
404 Health Analytics Centre (IHAC) collaborative network. The funder had no role in study  
405 design, data collection and analysis, decision to publish, or preparation of the  
406 manuscript.

## 407 **Competing interests**

408 This work was supported by the European Union's INTERREG VA Programme,  
409 managed by the Special EU Programmes Body (SEUPB); and Invest NI through  
410 Northern Ireland Science Park (Catalyst Inc) under the Northern Ireland International

411 Health Analytics Centre (IHAC) collaborative network. This does not alter our  
412 adherence to PLOS ONE policies on sharing data and materials. The funder has not  
413 serve or currently serve on the editorial board of the PLOS ONE journal. The funder  
414 has not sat or currently sit on a committee for an organization that may benefit from  
415 publication of the paper. The funder had no role in study design, data collection and  
416 analysis, decision to publish, or preparation of the manuscript.

## References

1. Badrick T. Evidence-based laboratory medicine. *Clin Biochem Rev* 2013; 34(2):43.
2. Kwok J, Jones B. Unnecessary repeat requesting of tests: an audit in a government hospital immunology laboratory. *J Clin Pathol*. 2005; 58(5): 457-62.
3. Karakusevic S, Edwards N, Lewis R, et al. The future of pathology services. 2016. Available at: <http://www.nuffieldtrust.org.uk/publications/futurepathology-services>. Accessed: 20 Nov 2017).
4. Newman-Toker DE, McDonald KM, Meltzer DO, et al. How much diagnostic safety can we afford, and how should we decide? A health economics perspective. *BMJ Qual Saf*. 2013;22: ii11-ii20.
5. Weydert JA, Nobbs ND, Feld R, et al. A simple, focused, computerized query to detect overutilization of laboratory tests. *Arch Pathol Lab Med*. 2005;129(9):1141-1143.
6. Wong ET, McCarron MM, Shaw ST. Ordering of laboratory tests in a teaching hospital: can it be improved? *JAMA*. 1983;249(22):3076-3080.
7. Young DW. Improving laboratory usage: a review. *Postgrad Med J*. 1988;64(750):283-289.
8. Epstein AM, McNeil BJ. Relationship of beliefs and behavior in test ordering. *Am J Med*. 1986; 80:865–870.
9. Huck A, Lewandrowski K. Utilization management in the clinical laboratory: an introduction and overview of the literature. *Clin Chim Acta*. 2014; 427: 111–117.
10. Lewandrowski K. Managing utilization of new diagnostic tests. *Clin Leadersh Manag Rev*. 2003;17:318–324.
11. van Walraven C, Naylor CD. Do we know what inappropriate laboratory utilization is? A systematic review of laboratory clinical audits. *JAMA*. 1998;280:550–558.

12. Snozek C, Kaleta E, Hernandez JS. Management structure: establishing a laboratory utilization program and tools for utilization management. *Clin Chim Acta*. 2014;427:118–122.
13. Department of Health. Report of the review of NHS pathology services in England: an independent review for the Department of Health. 2006. Available at: [http://collection.europarchive.org/tna/20070706124823/http://dh.gov.uk/en/Publicationsandstatistics/Publications/PublicationsPolicyAndGuidance/DH\\_4137606](http://collection.europarchive.org/tna/20070706124823/http://dh.gov.uk/en/Publicationsandstatistics/Publications/PublicationsPolicyAndGuidance/DH_4137606). Accessed: 14 Nov 2017.
14. Furness P. Roundtable pathology. *Health Service Journal Pathology* 2011; 3: 3.
15. Delvaux N, De Sutter A, Van de Velde S, Ramaekers D, Fieuws S, Aertgeerts B. Electronic Laboratory Medicine ordering with evidence-based Order sets in primary care (ELMO study): protocol for a cluster randomised trial. *Implement Sci*. 2017;12(1):147.
16. Horvath AR. From evidence to best practice in laboratory medicine. *Clin Biochem Rev*. 2013; 34(2): 47.
17. Smellie WSA. Demand management and test request rationalization. *Ann Clin Biochem* 2012; 49(4): 323-36.
18. ESMO minimum clinical recommendations for diagnosis, treatment and follow-up of advanced colorectal cancer. *Ann Oncol* 2001;12:1055.
19. Bugter-Maessen AM, Winkens RA, Grol RP, et al. Factors predicting differences among general practitioners in test ordering behaviour and in the response to feedback on test requests. *Fam Pract*. 1996;13: 254–258.
20. Baker R, Falconer Smith J, Lambert PC. Randomised controlled trial of the effectiveness of feedback in improving test ordering in general practice. *Scand J Prim Health Care*. 2003;21(4):219-223.

21. Buntinx F, Knottnerus JA, Crebolder HF, et al. Reactions of doctors to various forms of feedback designed to improve the sampling quality of cervical smears. *Qual Assur Health Care*. 1992;4(2):161-166.
22. Bunting PS, Van Walraven C. Effect of a controlled feedback intervention on laboratory test ordering by community physicians. *Clin Chem*. 2004; 50(2):321-326.
23. Showstack JA, Schroeder SA, Matsumoto MF. Changes in the use of medical technologies, 1972–1977: a study of 10 inpatient diagnoses. *N Engl J Med*. 1982; 306: 706–712.
24. Alonso-Cerezo MC, Martín JS, García Montes MA, de la Iglesia VM. Appropriate utilization of clinical laboratory tests. *Clin Chem Lab Med*. 2009;47(12):1461-1465.
25. Driskell OJ, Holland D, Hanna FW, Jones PW, Pemberton RJ, Tran M, et al. Inappropriate requesting of glycated hemoglobin (HbA1c) is widespread: assessment of prevalence, impact of national guidance, and practice-to-practice variability. *Clin Chem*. 2012;58(5):906-915.
26. Oxman AD, Thomson MA, Davis DA, Haynes RB. No magic bullets: a systematic review of 102 trials of interventions to improve professional practice. *Can Med Assoc J*. 1995;153:1423-31.
27. Grimshaw JM, Russell IT. Effect of clinical guidelines on medical practice: a systematic review of rigorous evaluations. *Lancet*. 1993;342:1317-22.
28. Northern Ireland Statistics and Research Agency. Review of the Statistical Classification and Delineation of Settlements. 2015. Available at: <http://www.nisra.gov.uk/archive/geography/review-of-the-statistical-classification-and-delineation-of-settlements-march-2015.pdf>. Accessed: 26 Dec 2017.
29. Conover WJ, Johnson ME, Johnson MM. A comparative study of tests for homogeneity of variances, with applications to the outer continental shelf bidding data. *Technometrics*. 1981;23(4):351-61.



30. Sen A, Srivastava M. Regression analysis: theory, methods, and applications.  
Springer Science & Business Media; 2012.
31. Jekel JF, Katz DL, Elmore JG, Wild D. Epidemiology, biostatistics and preventive  
medicine. Elsevier Health Sciences; 2007.
32. Meals DW, Spooner J, Dressing SA, Harcum JB. Statistical analysis for monotonic  
trends, Tech Notes 6. Developed for U.S. Environmental Protection Agency by  
Tetra Tech, Inc. 2011. Available at:  
[www.bae.ncsu.edu/programs/extension/wqg/319monitoring/tech\\_notes.htm](http://www.bae.ncsu.edu/programs/extension/wqg/319monitoring/tech_notes.htm).  
Accessed: 10 February 2018.
33. National Collaborating Centre for Chronic Conditions. Type 2 Diabetes: National  
Clinical Guidelines for Management in Primary and Secondary Care [update].  
Royal College of Physicians, 2008.
34. Hobbs FD, Delaney BC, Carson A, et al. A prospective controlled trial of  
computerized decision support for lipid management in primary care. *Fam Pract*  
1996; 13: 133-137.
35. O'Kane MJ, Casey L, Lynch PM, et al. Clinical outcome indicators, disease  
prevalence and test request variability in primary care. *Ann Clin Biochem* 2011;  
48(2): 155-158.
36. Smellie WSA, Galloway MJ, Chinn D. Is clinical practice variability the major  
reason for differences in pathology requesting patterns in general practice? *J Clin*  
*Pathol* 2002; 55: 312-314.
37. Baker R, Falconer Smith J, Lambert PC. Randomised controlled trial of the  
effectiveness of feedback in improving test ordering in general practice. *Scand J*  
*Prim Health Care*. 2003;21(4):219–223.
38. Zaat JO, van Eijk JT, Bonte HA. Laboratory test form design influences test  
ordering by general practitioners in the Netherlands. *Med Care*. 1992;30:189-198.

39. Novich M, Gillis L, Tauber AI. The laboratory test justified. *Am J Clin Pathol*. 1985;84:756-759.

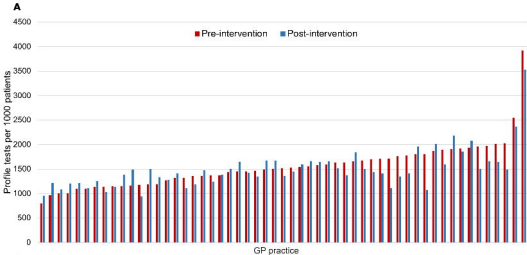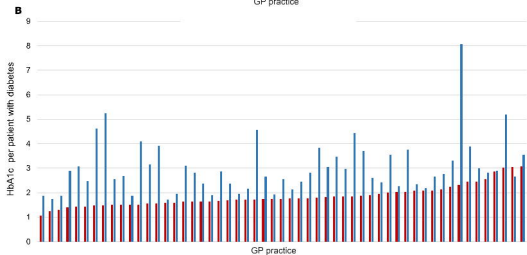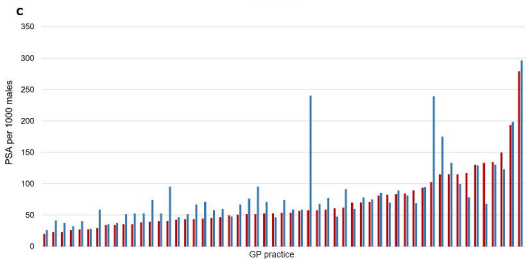

Source: http://biorxiv.org/content/10.1101/573956v1.full.pdf
